# Supplementary material for: A Phylogeographic Survey of the Pygmy Mouse Mus minutoides in South Africa: Taxonomic and Karyotypic Inference from Cytochrome b Sequences of Museum Specimens
Source: PubMed Central journal article supplement (PMC4048158; doi:10.1371/journal.pone.0098499), 2014-06-06

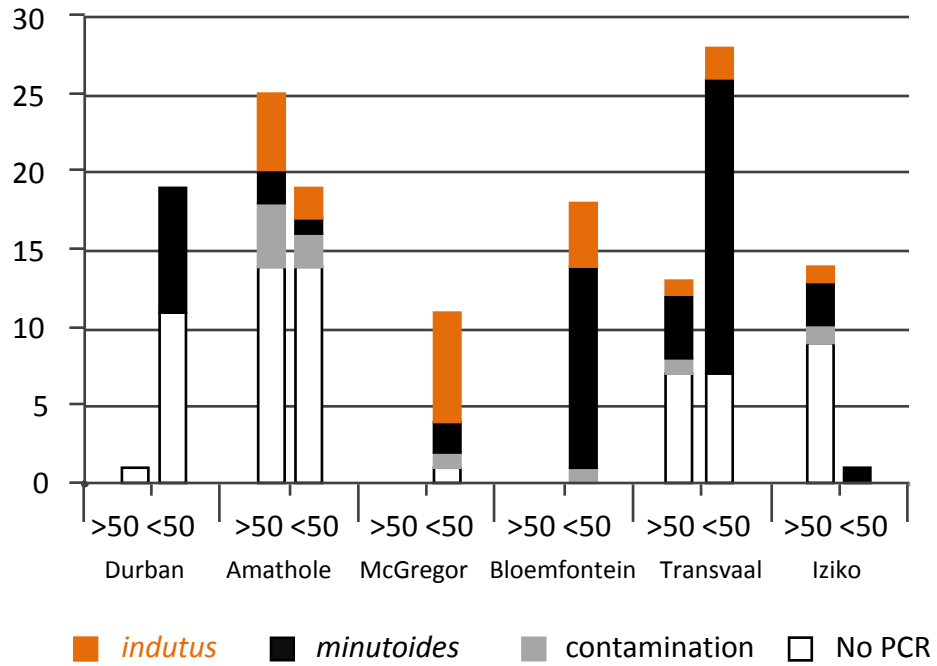

Supplement: pone.0098499.s001.pdf [file pone.0098499.s001.pdf]
