# Supplementary material for: A Phylogeographic Survey of the Pygmy Mouse Mus minutoides in South Africa: Taxonomic and Karyotypic Inference from Cytochrome b Sequences of Museum Specimens
Source: PubMed Central journal article supplement (PMC4048158; doi:10.1371/journal.pone.0098499), 2014-06-06
Supplement: pone.0098499.s002.pdf [file pone.0098499.s002.pdf]

A

```
10 20 30 40 50 60 70 80 90 100
L5510_AJ698874 ATGACAAATCATACGAAAATCACACCCACTACTTAAAAATACCTAACCTCTTTTATTGATTTACCTGCTCCCTCCAACATCTCATCATGATGAAACTTTG
US10_AJ875070 .....Y.....Y.....Y.....
US10_7clones .....C.....
I397_10clones .....
I387_9clones .....
ZM8583_7clones .....
mmkm1506_L7H8 .....R.....Y.....
mmKm7014_L7H8H11minu .....
mmKm3715_L7H8 .....M.....Y.....T.....
nmB6506_L7H8H11minu .....M.....Y.....Y.....
MMKM1488_L7H8minu .....
TM13326_L10H11minu ?????????M.....Y.....
NMB2413_L7H8minu .....R.....
NmB11717_L7H8H11minu .....R.....
KM18000_L7H8 .....T.....
KM29172_L10H11minu ?????????M.....M.....T.....
TM46605_L10H11minu ?????????
KM18422_L10H11minu ?????????
KM11840_L7H8minu .....
KM25540_L7H8 .....
KM3183_L7H11minu .....
KM29168_L7H11minu .....
I397_3clones .....T.....A.....C.....T.....
I397_1clone .....T.....A.....C.....T.....
I387_1clone .....C.....T.....A.....C.....G.....T.....
US10_2clones .....Y.....M.....C.....T.....
mmKm1507_L7H11minu .....T.....A.....C.....T.....
mmKm3734_L7H11minu .....T.....A.....C.....T.....
mmKm3719_L7H11minu .....T.....A.....C.....T.....
MMKM3717_L10H11minu ?????????Y.....M.....Y.....Y.....
mmKm3716_L7H11minu .....T.....A.....C.....T.....
mmKm3715_L7H11minu .....T.....A.....C.....T.....
mmkm3709_L7H11minu .....T.....A.....C.....T.....
KM18347_L10H11minu ?????????T.....A.....C.....T.....
mmkm1506_L7H11minu .....T.....A.....Y.....T.....
MMKM1488_H11minu .....T.....A.....C.....T.....
NMB9864_L7L10H11minu .....y.....m.....C.....T.....
mmKm3734_L7H8 .....Y.....M.....Y.....Y.....
mmKm3717_L7H11minu .....T.....A.....C.....T.....
MMKM3709_L10H11minu ?????????S.....N.....A.....R.....Y.....
TM13326_L7H11minu .....T.....C.....T.....
Nminu_Guinea .....A.....G.....T.....C.....G.....G.....C.....C.....C.....CC.....G.....C.....T.....T.....
Nminu_Ivory_Coast ?????????????????????T.....C.....G.....G.....C.....C.....CC.....G.....C.....T.....T.....
Nminu_Congo ?????????????????????T.....C.....G.....G.....C.....C.....C.....CC.....G.....C.....T.....T.....
Nminu_Gabon ?????????????????????T.....C.....G.....G.....C.....C.....CC.....G.....C.....T.....T.....
Nminu_Kenya .....A.....T.....C.....G.....A.....T.....C.....C.....C.....C.....G.....CA.....C.....T.....T.....
Nminu_Stellenbosh .....A.....T.....C.....G.....A.....T.....C.....C.....C.....C.....G.....A.....C.....T.....T.....
Nminu_Kuruman .....A.....T.....C.....G.....A.....T.....C.....C.....C.....C.....G.....A.....C.....T.....TG.....
Nminu_Tanzania .....A.....T.....C.....G.....A.....T.....C.....C.....C.....CC.....G.....C.....T.....T.....
Nmusc_AJ875075 .....T.....A.....G.....T.....C.....C.....C.....C.....C.....C.....T.....T.....
Nmusc_AJ698875 .....C.....A.....G.....T.....C.....C.....C.....C.....C.....C.....T.....T.....
Nmusc_HM635856 ?????????????????A.....T.....A.....G.....T.....C.....C.....C.....CC.....C.....C.....T.....T.....C.....
Nmusc_HM635855 ?????????????????A.....T.....A.....G.....T.....C.....C.....C.....CC.....C.....C.....T.....T.....C.....
Nmat_AJ875067 .....A.....G.....T.....T.....C.....G.....A.....T.....C.....C.....C.....T.....T.....
Nmat_AJ875069 .....A.....T.....T.....C.....G.....A.....T.....C.....C.....C.....T.....T.....
Nhaus_AJ875073 .....T.....G.....T.....T.....C.....A.....C.....T.....C.....C.....C.....T.....C.....T.....C.....
Nhaus_AJ875071 .....T.....G.....T.....T.....C.....A.....C.....T.....C.....C.....C.....T.....T.....C.....C.....
Nhaus_AJ875074 .....T.....G.....T.....T.....C.....A.....C.....T.....A.....C.....T.....T.....C.....C.....
```

```
110 120 130 140 150 160 170 180 190 200
L5510_AJ698874 GCTCCTATTAGGAATCTGTCTTATAGTCCAAATTCACAGGCTTATTCTTAGCCATACATTATACATCTGACACAATAACAGCTTTTTCATCAGTAAC
US10_AJ875070 .....Y.....R.....R.....Y.....W.....R.....
US10_7clones .....
I397_10clones .....
I387_9clones .....
ZM8583_7clones .....
mmkm1506_L7H8 .....S.....
mmKm7014_L7H8H11minu .....
mmKm3715_L7H8 .....
nmB6506_L7H8H11minu .....W.....
MMKM1488_L7H8minu .....
TM13326_L10H11minu .....S.....Y.....
NMB2413_L7H8minu .....
NmB11717_L7H8H11minu .....
KM18000_L7H8 .....
KM29172_L10H11minu .....
TM46605_L10H11minu .....
KM18422_L10H11minu .....
KM11840_L7H8minu .....
KM25540_L7H8 .....
KM3183_L7H11minu .....
KM29168_L7H11minu .....
```

|                      |                                                                                       |
|----------------------|---------------------------------------------------------------------------------------|
| I397_3clones         | .....G.....G.C.....A.....C.....G..                                                    |
| I397_1clone          | .....G.....G.C.....A.....C.....G..                                                    |
| I387_1clone          | .....G.....G.C.....A.....C.....G..                                                    |
| US10_2clones         | .....R.....R.C.....A.....Y.....R..                                                    |
| mmKm1507_L7H11minu   | .....G.....G.C.....A.....C.....G..                                                    |
| mmKm3734_L7H11minu   | .....G.....G.C.....A.....C.....G..                                                    |
| mmKm3719_L7H11minu   | .....G.....G.C.....A.....C.....G..                                                    |
| MMKM3717_L10H11minu  | .....R.....R.C.....W.....R.....R..                                                    |
| mmKm3716_L7H11minu   | .....G.....G.C.....A.....C.....G..                                                    |
| mmkm3715_L7H11minu   | .....G.....G.C.....A.....C.....G..                                                    |
| mmkm3709_L7H11minu   | .....G.....G.C.....A.....C.....G..                                                    |
| KM18347_L10H11minu   | .....G.....G.C.....A.....C.....G..                                                    |
| mmkm1506_L7H11minu   | .....R.....R.Y.....A.....Y.....R..                                                    |
| MMKM1488_H11minu     | .....G.....G.C.....A.....C.....G..                                                    |
| NMB9864_L7L10H11minu | .....F.....F.C.....A.....C.....G..                                                    |
| mmKm3734_L7H8        | .....R.....R.Y.....W.....Y.....R..                                                    |
| mmKm3717_L7H11minu   | .....G.....G.C.....A.....C.....G..                                                    |
| MMKM3709_L10H11minu  | .....W.....W.C.....A.....C.....G..                                                    |
| TM13326_L7H11minu    | .....CA.....G.C.....A.....C.....G..                                                   |
| Nminu_Guinea         | .A..T..TC.....T..C.....T.....C..T.....C..A.....C..T.....A.....C..C.....               |
| Nminu_Ivory_Coast    | .A..T..TC.....T..C.....T.....C..T.....T.....C..A.....C..C.....A.....C..C.....         |
| Nminu_Congo          | .A..T.....C.....C.....C.....C.....C.....A.....C.....A.....N.N.....C..C.....T..        |
| Nminu_Gabon          | .A..T.....C.....C.....A.....C.....C.....C.....A.....C.....A.....C.....C.....T..       |
| Nminu_Kenya          | .A..T.....C.....T.....C.....C.....C.....A.....C.....A.....C.....C.....C.....          |
| Nminu_Stellenbosh    | .A..T.....C.....C.....C.....C.....C.....A.....C.....C.....A.....G.....C..C.....       |
| Nminu_Kuruman        | .A..T.....G.....C.....C.....C.....C.....C.....A.....C.....C.....A.....G.....C..C..... |
| Nminu_Tanzania       | .A..T.....C.....C.....C.....C.....C.....A.....C.....C.....A.....C.....C.....          |
| Nmusc_AJ875075       | .G..T..GC.....C..A.....C.....C.....C.....T.....C..C.....A.....C.....C.....            |
| Nmusc_AJ698875       | .G..T..GC.....C..A.....C.....C.....C.....T.....C..C.....A.....C.....C.....            |
| Nmusc_HM635856       | .G..T..GC.....C..A.....C.....N.....C.....T.....C..C.....A.....C.....C.....            |
| Nmusc_HM635855       | .G..T..C.....C..A.....C.....N.....C.....T.....C..C.....A.....C.....C.....             |
| Nmat_AJ875067        | .....CC.....G..T..C..C..A.....G.....C.....A.....A.....T.C.....C.....C.....            |
| Nmat_AJ875069        | .G..T..CC.....C..A.....G.....C.....C.....A.....A.....T.C.....C.....C.....T..          |
| Nhaus_AJ875073       | .A.....CC.....T.....C.....C.....TC.....A.....A.....A.....C.....C.....G.....           |
| Nhaus_AJ875071       | .A.....CC.....T.....C.....C.....TC.....A.....C.....A.....C.....C.....G.....           |
| Nhaus_AJ875074       | .A.....CC.....T.....C.....C.....TC.....A.....C.....A.....C.....C.....G.....           |

210 220 230 240 250 260 270 280 290 300

|                      |                                                                                                       |
|----------------------|-------------------------------------------------------------------------------------------------------|
| L5510_AJ698874       | ACATATCTGTTCGAGACGTAAACTACGGATGATTAATCCGATACATACACGCAAAACGGAGCCTCCATATCTTTATCTGCTTATTTATACACGTAGGACGA |
| US10_AJ875070        | .....Y.....T.....T.....                                                                               |
| US10_7clones         | .....T.....T.....                                                                                     |
| I397_10clones        | .....T.....                                                                                           |
| I387_9clones         | .....T.....                                                                                           |
| ZM8583_7clones       | .....T.....                                                                                           |
| mmkm1506_L7H8        | .....T.....                                                                                           |
| mmKm7014_L7H8H11minu | .....T.....T.....                                                                                     |
| mmKm3715_L7H8        | .....T.....                                                                                           |
| nmB6506_L7H8H11minu  | .....T.....T.....                                                                                     |
| MMKM1488_L7H8minu    | .....T.....T.....                                                                                     |
| TM13326_L10H11minu   | .....T.....                                                                                           |
| NMB2413_L7H8minu     | .....T.....T.....                                                                                     |
| NmB11717_L7H8H11minu | .....T.....                                                                                           |
| KM18000_L7H8         | .....T.....                                                                                           |
| KM29172_L10H11minu   | .....M.....T.....                                                                                     |
| TM46605_L10H11minu   | .....T.....                                                                                           |
| KM18422_L10H11minu   | .....T.....                                                                                           |
| KM11840_L7H8minu     | .....T.....                                                                                           |
| KM25540_L7H8         | .....T.....                                                                                           |
| KM3183_L7H11minu     | .....T.....                                                                                           |
| KM29168_L7H11minu    | .....T.....                                                                                           |
| I397_3clones         | .....C.....A.....T.....T.....T.....T.....T.....T.....T.....T.....                                     |
| I397_1clone          | T.....C.....T.....T.....C.....A.....T.....G.....T.....T.....T.....TC.....C.G.....T.....A.....         |
| I387_1clone          | .....C.....A.....T.....T.....T.....T.....T.....T.....T.....T.....T.....T.....T.....                   |
| US10_2clones         | .....Y.....R.....R.....T.....T.....K.....T.....T.....Y.....                                           |
| mmKm1507_L7H11minu   | .....C.....A.....T.....T.....T.....T.....T.....T.....T.....T.....                                     |
| mmKm3734_L7H11minu   | .....C.....A.....T.....T.....T.....T.....T.....T.....T.....T.....                                     |
| mmKm3719_L7H11minu   | .....C.....A.....T.....T.....T.....T.....T.....T.....T.....T.....                                     |
| MMKM3717_L10H11minu  | .....Y.....R.....T.....T.....T.....T.....W.....T.....Y.....                                           |
| mmKm3716_L7H11minu   | .....C.....A.....T.....T.....T.....T.....T.....T.....T.....T.....                                     |
| mmkm3715_L7H11minu   | .....C.....A.....T.....T.....T.....T.....T.....T.....T.....T.....                                     |
| mmkm3709_L7H11minu   | .....C.....A.....T.....T.....T.....T.....T.....T.....T.....T.....                                     |
| KM18347_L10H11minu   | .....C.....A.....T.....T.....T.....T.....T.....T.....T.....T.....                                     |
| mmkm1506_L7H11minu   | .....Y.....R.....T.....T.....T.....T.....W.....T.....Y.....                                           |
| MMKM1488_H11minu     | .....C.....A.....T.....T.....T.....T.....Y.....T.....T.....                                           |
| NMB9864_L7L10H11minu | .....y.....f.....T.....T.....T.....T.....T.....T.....                                                 |
| mmKm3734_L7H8        | .....Y.....R.....T.....T.....T.....T.....W.....T.....                                                 |
| mmKm3717_L7H11minu   | .....C.....A.....T.....T.....T.....T.....T.....T.....T.....T.....                                     |
| MMKM3709_L10H11minu  | .....C.....C.....T.....T.....T.....T.....T.....T.....T.....T.....                                     |
| TM13326_L7H11minu    | .....G.....T.....T.....T.....T.....T.....T.....T.....T.....                                           |
| Nminu_Guinea         | .....C.....T.....C.....TT.....T..C.....T.....G.....T.....T.....G.....                                 |
| Nminu_Ivory_Coast    | .....C.....C.....T.....C.....TT.....T..C.....T.....T.....T.....T.....G.....                           |
| Nminu_Congo          | .....C.....C.....T.....T.....C.....T.....T..C.....T.....T.....T.....T.....G.....                      |
| Nminu_Gabon          | .....C.....C.....T.....T.....C.....T.....T..C.....T.....T.....T.....T.....G.....                      |
| Nminu_Kenya          | .....C.....C.....T.....T.....C.....T.....T..C.....T.....T.....T.....T.....G.....                      |
| Nminu_Stellenbosh    | .....C.....C.....T.....T.....GC.....C..T..C.....G.....T.....T.....T.....G.....                        |
| Nminu_Kuruman        | .....T..C.....T.....T.....GC.....C..T..C.....G.....T.....T.....C.....G.....                           |

```

Nminu_Tanzania      .....T.....T.....C......C.....T.C......T.....T.....T.....G
Nmusc_AJ875075     .....C.....T.....T.....TT.....C......C.....CT.....G
Nmusc_AJ698875     .....C.....T.....T.....TT.....C......CT.....G
Nmusc_HM635856     .....C.....T.....N.....TT.....C......T.....T.....G
Nmusc_HM635855     .....C.....T.....N..GN.....TT.....C.....N.....T.....N.G
Nmat_AJ875067      C......T......C.....T.....T.....T.....T.....C.G..T.....
Nmat_AJ875069      C......T......C.....T.....T.....T......C.G..T.....
Nhaus_AJ875073     C......C.....T..T..T.....T......CC.G..A.....
Nhaus_AJ875071     C......C.....T..T......C......C.G.....
Nhaus_AJ875074     C......C.....T..T.....T......C.G.....

```

310 320 330 340 350 360 370 380 390 400

```

L5510_AJ698874    GGAATATACTATGGATCTTACACATTTATAGAAACATGAAATATTGGGGTTATCTATTATTTCGCTGTGATAGCCACAGCATTTCATAGGTTATGTCCCTCC
US10_AJ875070     .....Y.....
US10_7clones      .....
I397_10clones     .....
I387_9clones      .....T.....
ZM8583_7clones    .....
mmkm1506_L7H8     .....
mmKm7014_L7H8H1lminu .....
mmKm3715_L7H8     .....A.....
nmB6506_L7H8H1lminu .....
MMKM1488_L7H8minu .....
TM13326_L10H1lminu .....R.....T.....
NMB2413_L7H8minu .....
NmB11717_L7H8H1lminu .....G.....K.....
KM18000_L7H8      .....
KM29172_L10H1lminu .....
TM46605_L10H1lminu .....T.....
KM18422_L10H1lminu .....T.....
KM11840_L7H8minu .....T.....
KM25540_L7H8      .....T.....
KM3183_L7H1lminu .....T.....
KM29168_L7H1lminu .....T.....

```

```

I397_3clones      .....C......T.....A.....
I397_1clone       ..G.G.....G..C..T.....TGG.GTAATTCTACTA.T.GC.G.AATAGCCACATCATTT.TAGG.T..GTTC.TCCATGAGG
I387_1clone       .....C......T.....A.....C.....
US10_2clones      .....C......T.....A.....
mmKm1507_L7H1lminu .....C......T.....A.....
mmKm3734_L7H1lminu .....C......T.....A.....
mmKm3719_L7H1lminu .....C......T.....A.....
MMKM3717_L10H1lminu .....Y.....
mmKm3716_L7H1lminu .....C......T.....A.....
mmkm3715_L7H1lminu .....C......T.....A.....
mmkm3709_L7H1lminu .....C......T.....A.....
KM18347_L10H1lminu .....C......T.....A.....
mmkm1506_L7H1lminu .....Y.....Y.....Y.....R.....
MMKM1488_H1lminu .....C......T.....A.....
NMB9864_L7L10H1lminu .....C......T.....A.....
mmKm3734_L7H8     .....Y.....
mmKm3717_L7H1lminu .....C......T.....A.....
MMKM3709_L10H1lminu .....
TM13326_L7H1lminu .....C......T.....A.....

```

```

Nminu_Guinea      .....G.....C.....C.....C.....C.....T.A.....T.....
Nminu_Ivory_Coast .....G.....C.....C.....C.....C.....T.A.....T.....
Nminu_Congo       .....C.....C......T.C.G..T.A.....T.....T.....
Nminu_Gabon       .....C.....C......T.C.G..T.A.....T.....T.....
Nminu_kenya       .....G.....C.....C.....CT.C.G..T.A.....T.G.....
Nminu_Stellenbosh .....G.....C.....C.....T.C.G..T.A.A.....T.....T.....
Nminu_Kuruman     ..G..G..C..C......T.C.G..T.A.C.....T.G.....
Nminu_Tanzania    .....G.....C.....C..T.....C.....CT.C.....T.A.....T.....C.....
Nmusc_AJ875075     ..G..G..C.....T.....C......A......T.A.A.....T.....T.....T.....T.....T.....
Nmusc_AJ698875     ..G..G..C.....C......A.A......T.A.A.....T.....T.....T.....T.....T.....
Nmusc_HM635856     .....G.....G......A.A......T.A.A.....T.....T.....T.....A.....
Nmusc_HM635855     ..G..G..N.....N.....A.A......T.A.A.....T.....T.....T.....T.....A.....
Nmat_AJ875067     .....T.....C.....T......A.A.....T.C.....T.A.A.....T.....T.....A.A.T.....
Nmat_AJ875069     .....T.....C.....T......A.....CT.C.....T.A.A.....T.....T.....T.....T.....T.....
Nhaus_AJ875073     .....C.....T......A.A.G.C..CC.....T.A.A.....T.....T.....T.....T.....
Nhaus_AJ875071     .....C.....T......A.A.G.C..CC.....T.A.A.....T.....T.....T.....A.....
Nhaus_AJ875074     .....G.....T......A.A.G.C..CC.....T.A.A.....T.....T.....T.....A.....

```

410 420 430 440 450 460

```

L5510_AJ698874    CATGAGGACAAATATCATTTTGGAGGGCCACAGTAATTTACAAATCTTCTATCAGCAGTTCCATA
US10_AJ875070     .....R.....Y.....
US10_7clones      .....A.....
I397_10clones     .....
I387_9clones      .....
ZM8583_7clones    ..
mmkm1506_L7H8     ...
mmKm7014_L7H8H1lminu .....
mmKm3715_L7H8     ..R.....
nmB6506_L7H8H1lminu .....A.....
MMKM1488_L7H8minu .....
TM13326_L10H1lminu .....

```

```

NMB2413_L7H8minu      ...
NmB11717_L7H8H11minu .....
KM18000_L7H8         ...
KM29172_L10H11minu  .....
TM46605_L10H11minu  .....
KM18422_L10H11minu  .....
KM11840_L7H8minu    ...
KM25540_L7H8        .....C.....
KM3183_L7H11minu    .....
KM29168_L7H11minu    .....
I397_3clones         .....G.A.....A.C.....
I397_1clone          ACAA.T.T.TT.TGAGGAGCA.CA.TAAT.CA...CTATT..AG...TTCATA
I387_1clone          .....G.A.....A.C.....
US10_2clones         .....G.R.....R.C.....
mmKm1507_L7H11minu   .....G.A.....A.C.....
mmKm3734_L7H11minu   .....G.A.....A.C.....
mmKm3719_L7H11minu   .....G.A.....A.C.....
MMKM3717_L10H11minu  .....R.....A.C.....
mmKm3716_L7H11minu   .....G.A.....A.C.....
mmkm3715_L7H11minu   .....G.A.....A.C.....
mmkm3709_L7H11minu   .....G.A.....A.C.....
KM18347_L10H11minu   .....G.A.....A.C.....
mmkm1506_L7H11minu   .....R.A.....A.C.....
MMKM1488_H11minu     .....G.A.....
NMB9864_L7L10H11minu .....A.....A.C.....
mmKm3734_L7H8        ...
mmKm3717_L7H11minu   .....G.A.....A.C.....
MMKM3709_L10H11minu  .....
TM13326_L7H11minu    .....G.....
Nminu_Guinea         ...G.G.G.....T.....C.....CA.C.....
Nminu_Ivory_Coast    ...G.G.G.....T.....C.....CA.C.....
Nminu_Congo          ...G.G.G.....A.T.....C.....CA.....
Nminu_Gabon          ...G.G.G.....A.T.....C.....CA.....
Nminu_Kenya          ...G.G.G.....T.....C.....CA.....
Nminu_Stellenbosh    ...G.G.G.....T.....C.....CA.....
Nminu_Kuruman        ...G.G.G.....T.G.....C.....CA.C.....
Nminu_Tanzania       .....G.....T.....C.....TA.....
Nmusc_AJ875075       .....A.T.....C.C.CT.....CA.....
Nmusc_AJ698875       .....A.T.....C.C.....CA.....
Nmusc_HM635856       .....A.....C.....C.....N.CA.....
Nmusc_HM635855       .....A.....C.C.....CA.....
Nmat_AJ875067        .....C.T.....C.....TA.....
Nmat_AJ875069        .....C.T.....C.....TA.....
Nhaus_AJ875073       .....T.....C.....TA.C.....
Nhaus_AJ875071       .....C.G.....TA.C.....
Nhaus_AJ875074       .....C.....T.....TA.C.....

```

| Accession            | Species               | 10    | 20    | 30    | 40    | 50    | 60    | 70    | 80    | 90    | 100   | 110   | 120   | 130   | 140   | 150   |
|----------------------|-----------------------|-------|-------|-------|-------|-------|-------|-------|-------|-------|-------|-------|-------|-------|-------|-------|
| I55110_AJ698874      | US10_AJ875070         | ..... | ..... | ..... | ..... | ..... | ..... | ..... | ..... | ..... | ..... | ..... | ..... | ..... | ..... | ..... |
| US10_7clones         | I397_10clones         | ..... | ..... | ..... | ..... | ..... | ..... | ..... | ..... | ..... | ..... | ..... | ..... | ..... | ..... | ..... |
| I397_9clones         | ZM8583_7clones        | ..... | ..... | ..... | ..... | ..... | ..... | ..... | ..... | ..... | ..... | ..... | ..... | ..... | ..... | ..... |
| nmkml506_L78         | nmkml7014_L789H1Iminu | ..... | ..... | ..... | ..... | ..... | ..... | ..... | ..... | ..... | ..... | ..... | ..... | ..... | ..... | ..... |
| nmkml506_L78         | nmkml715_L78          | ..... | ..... | ..... | ..... | ..... | ..... | ..... | ..... | ..... | ..... | ..... | ..... | ..... | ..... | ..... |
| nmB6506_L78H81Iminu  | MMKml488_L788mlnu     | ..... | ..... | ..... | ..... | ..... | ..... | ..... | ..... | ..... | ..... | ..... | ..... | ..... | ..... | ..... |
| TM13326_L10H1Iminu   | TM13326_L10H1Iminu    | ..... | ..... | ..... | ..... | ..... | ..... | ..... | ..... | ..... | ..... | ..... | ..... | ..... | ..... | ..... |
| NMB2413_L788mlnu     | NMB11717_L789H1Iminu  | ..... | ..... | ..... | ..... | ..... | ..... | ..... | ..... | ..... | ..... | ..... | ..... | ..... | ..... | ..... |
| KM18000_L7H8         | TM46605_L10H1Iminu    | ..... | ..... | ..... | ..... | ..... | ..... | ..... | ..... | ..... | ..... | ..... | ..... | ..... | ..... | ..... |
| TM46605_L10H1Iminu   | KM18422_L10H1Iminu    | ..... | ..... | ..... | ..... | ..... | ..... | ..... | ..... | ..... | ..... | ..... | ..... | ..... | ..... | ..... |
| KM18422_L10H1Iminu   | KM11840_L788mlnu      | ..... | ..... | ..... | ..... | ..... | ..... | ..... | ..... | ..... | ..... | ..... | ..... | ..... | ..... | ..... |
| KM11840_L788mlnu     | KM25540_L7H8          | ..... | ..... | ..... | ..... | ..... | ..... | ..... | ..... | ..... | ..... | ..... | ..... | ..... | ..... | ..... |
| KM25540_L7H8         | KM3183_L7H1Iminu      | ..... | ..... | ..... | ..... | ..... | ..... | ..... | ..... | ..... | ..... | ..... | ..... | ..... | ..... | ..... |
| KM3183_L7H1Iminu     | KM29168_L7H1Iminu     | ..... | ..... | ..... | ..... | ..... | ..... | ..... | ..... | ..... | ..... | ..... | ..... | ..... | ..... | ..... |
| KM29168_L7H1Iminu    | I397_3clones          | ..... | ..... | ..... | ..... | ..... | ..... | ..... | ..... | ..... | ..... | ..... | ..... | ..... | ..... | ..... |
| I397_3clones         | I397_1clone           | ..... | ..... | ..... | ..... | ..... | ..... | ..... | ..... | ..... | ..... | ..... | ..... | ..... | ..... | ..... |
| I397_1clone          | US10_2clones          | ..... | ..... | ..... | ..... | ..... | ..... | ..... | ..... | ..... | ..... | ..... | ..... | ..... | ..... | ..... |
| US10_2clones         | nmkml507_L7H1Iminu    | ..... | ..... | ..... | ..... | ..... | ..... | ..... | ..... | ..... | ..... | ..... | ..... | ..... | ..... | ..... |
| nmkml507_L7H1Iminu   | nmkml3734_L7H1Iminu   | ..... | ..... | ..... | ..... | ..... | ..... | ..... | ..... | ..... | ..... | ..... | ..... | ..... | ..... | ..... |
| nmkml3734_L7H1Iminu  | nmkml3719_L7H1Iminu   | ..... | ..... | ..... | ..... | ..... | ..... | ..... | ..... | ..... | ..... | ..... | ..... | ..... | ..... | ..... |
| nmkml3719_L7H1Iminu  | MMKml3717_L10H1Iminu  | ..... | ..... | ..... | ..... | ..... | ..... | ..... | ..... | ..... | ..... | ..... | ..... | ..... | ..... | ..... |
| MMKml3717_L10H1Iminu | nmkml3716_L7H1Iminu   | ..... | ..... | ..... | ..... | ..... | ..... | ..... | ..... | ..... | ..... | ..... | ..... | ..... | ..... | ..... |
| nmkml3716_L7H1Iminu  | nmkml3715_L7H1Iminu   | ..... | ..... | ..... | ..... | ..... | ..... | ..... | ..... | ..... | ..... | ..... | ..... | ..... | ..... | ..... |
| nmkml3715_L7H1Iminu  | nmkml3709_L7H1Iminu   | ..... | ..... | ..... | ..... | ..... | ..... | ..... | ..... | ..... | ..... | ..... | ..... | ..... | ..... | ..... |
| nmkml3709_L7H1Iminu  | KM18347_L10H1Iminu    | ..... | ..... | ..... | ..... | ..... | ..... | ..... | ..... | ..... | ..... | ..... | ..... | ..... | ..... | ..... |
| KM18347_L10H1Iminu   | nmkml506_L7H1Iminu    | ..... | ..... | ..... | ..... | ..... | ..... | ..... | ..... | ..... | ..... | ..... | ..... | ..... | ..... | ..... |
| nmkml506_L7H1Iminu   | MMKml488_H1Iminu      | ..... | ..... | ..... | ..... | ..... | ..... | ..... | ..... | ..... | ..... | ..... | ..... | ..... | ..... | ..... |
| MMKml488_H1Iminu     | NMB9864_L7L10H1Iminu  | ..... | ..... | ..... | ..... | ..... | ..... | ..... | ..... | ..... | ..... | ..... | ..... | ..... | ..... | ..... |
| NMB9864_L7L10H1Iminu | nmkml3734_L7H8        | ..... | ..... | ..... | ..... | ..... | ..... | ..... | ..... | ..... | ..... | ..... | ..... | ..... | ..... | ..... |
| nmkml3734_L7H8       | nmkml3717_L7H1Iminu   | ..... | ..... | ..... | ..... | ..... | ..... | ..... | ..... | ..... | ..... | ..... | ..... | ..... | ..... | ..... |
| nmkml3717_L7H1Iminu  | MMKml3709_L10H1Iminu  | ..... | ..... | ..... | ..... | ..... | ..... | ..... | ..... | ..... | ..... | ..... | ..... | ..... | ..... | ..... |
| MMKml3709_L10H1Iminu | TM13326_L7H1Iminu     | ..... | ..... | ..... | ..... | ..... | ..... | ..... | ..... | ..... | ..... | ..... | ..... | ..... | ..... | ..... |
| TM13326_L7H1Iminu    | Nmlnu_Guinea          | ..... | ..... | ..... | ..... | ..... | ..... | ..... | ..... | ..... | ..... | ..... | ..... | ..... | ..... | ..... |
| Nmlnu_Guinea         | Nmlnu_Ivory_Coast     | ..... | ..... | ..... | ..... | ..... | ..... | ..... | ..... | ..... | ..... | ..... | ..... | ..... | ..... | ..... |
| Nmlnu_Ivory_Coast    | Nmlnu_Congo           | ..... | ..... | ..... | ..... | ..... | ..... | ..... | ..... | ..... | ..... | ..... | ..... | ..... | ..... | ..... |
| Nmlnu_Congo          | Nmlnu_Gabon           | ..... | ..... | ..... | ..... | ..... | ..... | ..... | ..... | ..... | ..... | ..... | ..... | ..... | ..... | ..... |
| Nmlnu_Gabon          | Nmlnu_Kenya           | ..... | ..... | ..... | ..... | ..... | ..... | ..... | ..... | ..... | ..... | ..... | ..... | ..... | ..... | ..... |
| Nmlnu_Kenya          | Nmlnu_StelLenbosh     | ..... | ..... | ..... | ..... | ..... | ..... | ..... | ..... | ..... | ..... | ..... | ..... | ..... | ..... | ..... |
| Nmlnu_StelLenbosh    | Nmlnu_Kuruman         | ..... | ..... | ..... | ..... | ..... | ..... | ..... | ..... | ..... | ..... | ..... | ..... | ..... | ..... | ..... |
| Nmlnu_Kuruman        | Nmlnu_Tanzania        | ..... | ..... | ..... | ..... | ..... | ..... | ..... | ..... | ..... | ..... | ..... | ..... | ..... | ..... | ..... |
| Nmlnu_Tanzania       | Nmusc_AJ875075        | ..... | ..... | ..... | ..... | ..... | ..... | ..... | ..... | ..... | ..... | ..... | ..... | ..... | ..... | ..... |
| Nmusc_AJ875075       | Nmusc_AJ698875        | ..... | ..... | ..... | ..... | ..... | ..... | ..... | ..... | ..... | ..... | ..... | ..... | ..... | ..... | ..... |
| Nmusc_AJ698875       | Nmusc_HM635855        | ..... | ..... | ..... | ..... | ..... | ..... | ..... | ..... | ..... | ..... | ..... | ..... | ..... | ..... | ..... |
| Nmusc_HM635855       | Nmat_AJ875067         | ..... | ..... | ..... | ..... | ..... | ..... | ..... | ..... | ..... | ..... | ..... | ..... | ..... | ..... | ..... |
| Nmat_AJ875067        | Nmat_AJ875069         | ..... | ..... | ..... | ..... | ..... | ..... | ..... | ..... | ..... | ..... | ..... | ..... | ..... | ..... | ..... |
| Nmat_AJ875069        | Nhaus_AJ875073        | ..... | ..... | ..... | ..... | ..... | ..... | ..... | ..... | ..... | ..... | ..... | ..... | ..... | ..... | ..... |
| Nhaus_AJ875073       | Nhaus_AJ875071        | ..... | ..... | ..... | ..... | ..... | ..... | ..... | ..... | ..... | ..... | ..... | ..... | ..... | ..... | ..... |
| Nhaus_AJ875071       | Nhaus_AJ875074        | ..... | ..... | ..... | ..... | ..... | ..... | ..... | ..... | ..... | ..... | ..... | ..... | ..... | ..... | ..... |
| Nhaus_AJ875074       |                       | ..... | ..... | ..... | ..... | ..... | ..... | ..... | ..... | ..... | ..... | ..... | ..... | ..... | ..... | ..... |

Other Nannomys
